# Supplementary material for: Molecular Imprinted Polymer of Methacrylic Acid Functionalised β-Cyclodextrin for Selective Removal of 2,4-Dichlorophenol
Source: PubMed Central journal article supplement (PMC4013619; doi:10.3390/ijms15046111), 2014-04-10
Supplement: ijms-15-06111-s001.pdf [file ijms-15-06111-s001.pdf]

## Supplementary Information

**Figure S1.**  $^1\text{H}$  NMR spectrum of (a) Inclusion complex (MAA- $\beta$ CD-DCP); (b) 2,4-DCP and (c) MAA- $\beta$ CD monomer.

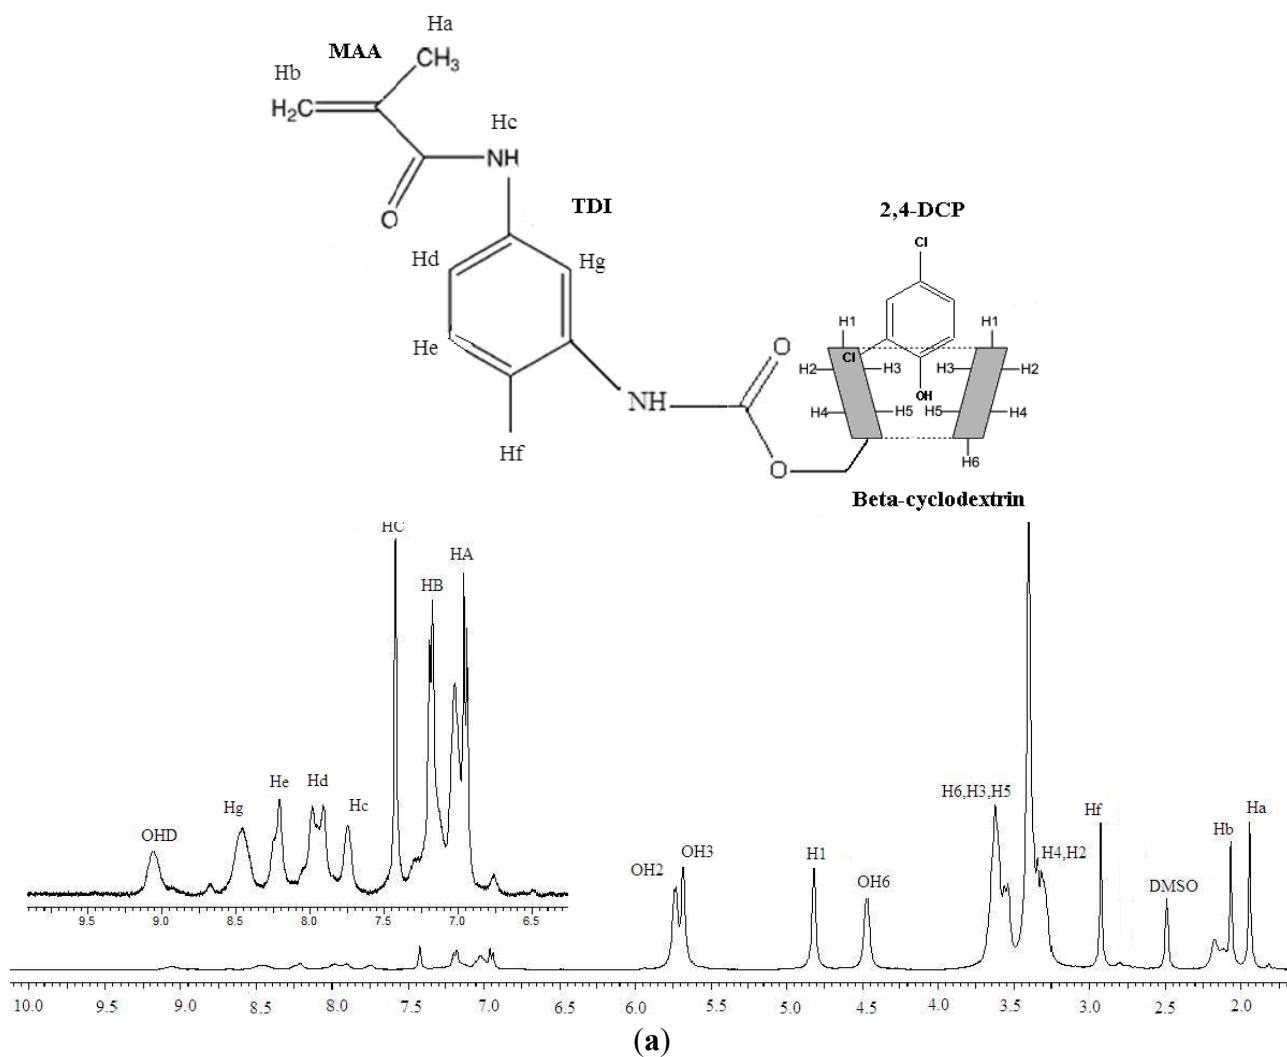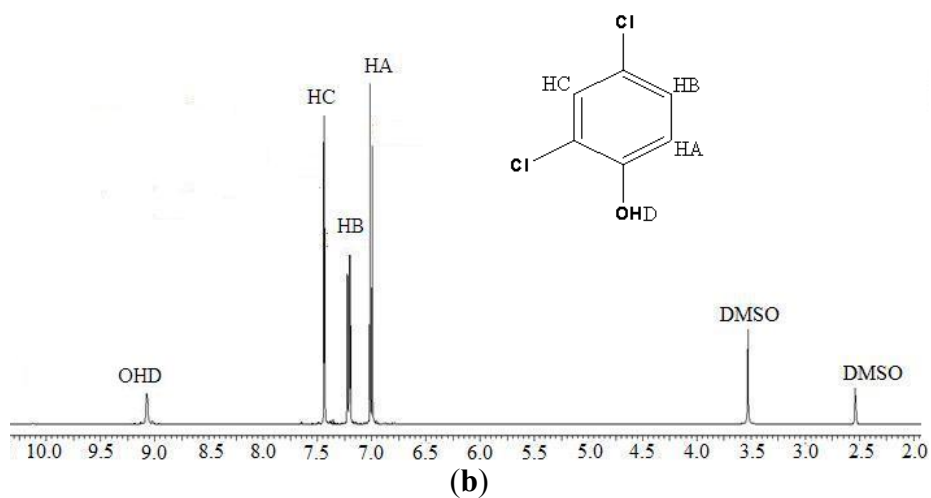

Figure S1. Cont.

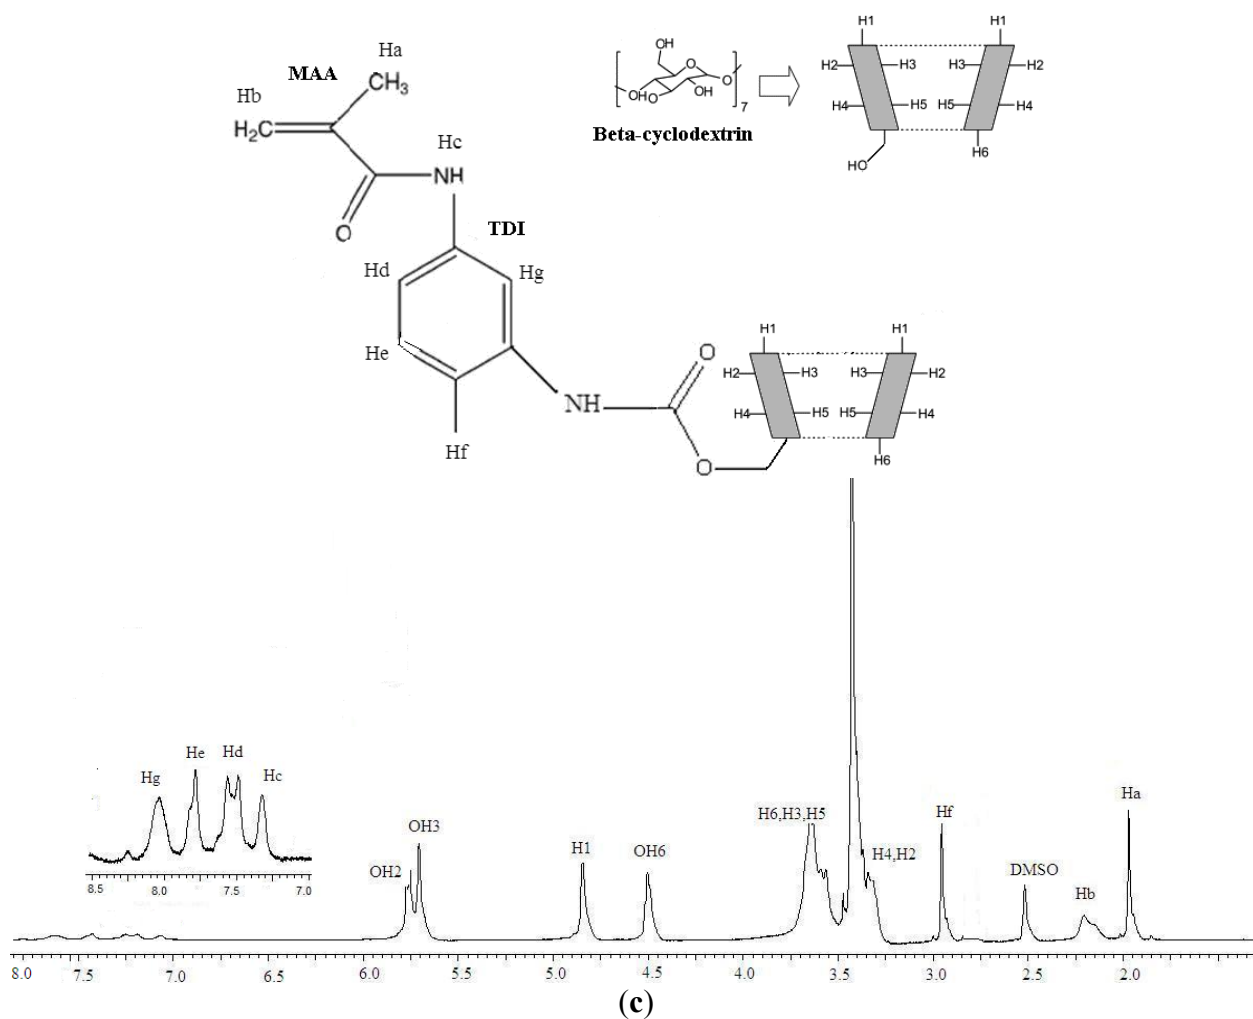

**Table S1.**  $^1\text{H}$  NMR chemical shift (ppm) for MAA- $\beta$ CD, 2,4-DCP and inclusion complex (MAA- $\beta$ CD-DCP).

| Compounds | MAA- $\beta$ CD ( $\delta$ ppm) | DCP ( $\delta$ ppm) | MAA- $\beta$ CD-DCP ( $\delta$ ppm) | $\Delta$ MAA- $\beta$ CD-DCP ( $\delta$ ppm) |
|-----------|---------------------------------|---------------------|-------------------------------------|----------------------------------------------|
| MAA       |                                 |                     |                                     |                                              |
| Ha        | 1.9445                          |                     | 1.9408                              | -0.0037                                      |
| Hb        | 2.7713                          |                     | 2.7676                              | -0.0037                                      |
| TDI       |                                 |                     |                                     |                                              |
| Hc        | 7.7248                          |                     | 7.7481                              | 0.0233                                       |
| Hd        | 7.9205                          |                     | 7.9079                              | -0.0126                                      |
| He        | 8.2204                          |                     | 8.2088                              | -0.0116                                      |
| Hf        | 2.9306                          |                     | 2.9245                              | -0.0061                                      |
| Hg        | 8.4229                          |                     | 8.4547                              | 0.0318                                       |

Table S1. Cont.

| Compounds       | MAA- $\beta$ CD ( $\delta$ ppm) | DCP ( $\delta$ ppm) | MAA- $\beta$ CD-DCP ( $\delta$ ppm) | $\Delta$ MAA- $\beta$ CD-DCP ( $\delta$ ppm) |
|-----------------|---------------------------------|---------------------|-------------------------------------|----------------------------------------------|
| $\beta$ -CD     |                                 |                     |                                     |                                              |
| H <sub>1</sub>  | 4.8203                          |                     | 4.8179                              | -0.0024                                      |
| H <sub>2</sub>  | 3.3272                          |                     | 3.3156                              | -0.0116                                      |
| H <sub>3</sub>  | 3.6213                          |                     | 3.5621                              | -0.0592                                      |
| H <sub>4</sub>  | 3.362                           |                     | 3.3406                              | -0.0214                                      |
| H <sub>5</sub>  | 3.6012                          |                     | 3.5395                              | -0.0617                                      |
| H <sub>6</sub>  | 3.6482                          |                     | 3.6231                              | -0.0251                                      |
| OH <sub>2</sub> | 5.5806                          |                     | 5.7265                              | 0.1459                                       |
| OH <sub>3</sub> | 5.6752                          |                     | 5.6795                              | 0.0043                                       |
| OH <sub>6</sub> | 4.4487                          |                     | 4.4707                              | 0.022                                        |
| DCP             |                                 |                     |                                     |                                              |
| H <sub>A</sub>  |                                 | 6.9499              | 6.9377                              | -0.0122                                      |
| H <sub>B</sub>  |                                 | 7.1879              | 7.1952                              | 0.0073                                       |
| H <sub>C</sub>  |                                 | 7.3697              | 7.4216                              | 0.0519                                       |
| OH <sub>D</sub> |                                 | 9.83                | 9.063                               | -0.767                                       |

Figure S2. Plot of Absorbance versus number of washing of template molecule (2,4-dichlorophenol).

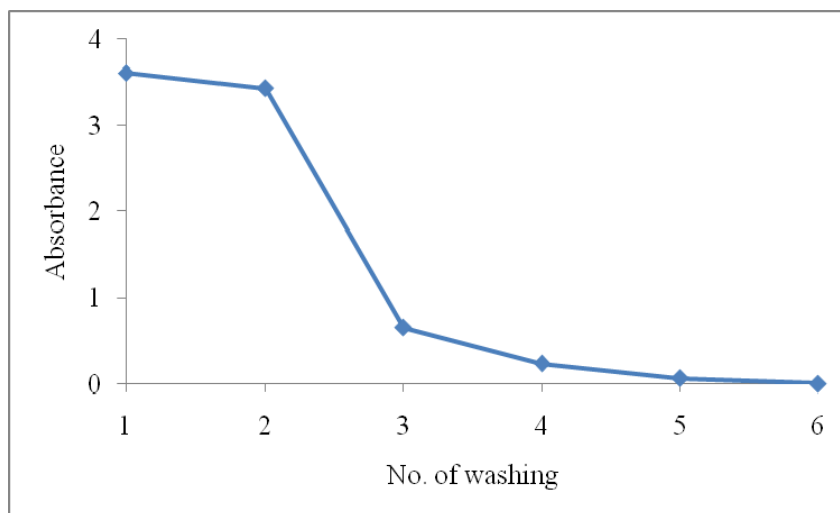

© 2014 by the authors; licensee MDPI, Basel, Switzerland. This article is an open access article distributed under the terms and conditions of the Creative Commons Attribution license (<http://creativecommons.org/licenses/by/3.0/>).
